# Supplementary material
Source: publisher figshare collection journal article supplement (https://rs.figshare.com/ndownloader/files/12302441)
Supplement: Supplementary file [file 12302441]

## **Supporting information for “Compilation and evaluation of gas phase diffusion coefficients of halogenated organic compounds”**

Instruction:

1. Units used in this work is K for temperature ( $T$ ) and Torr for pressure ( $P$ ).
2. Experimentally measured diffusion coefficients reported in literature have been converted to measured diffusivities ( $D_m$ ) in the unit of Torr cm<sup>2</sup> s<sup>-1</sup>, and Fuller’s semi-empirical method is used in this work to estimate diffusivities ( $D_e$ , in the unit of Torr cm<sup>2</sup> s<sup>-1</sup>).

## Table of Contents

|                                                                                                                                                                               |    |
|-------------------------------------------------------------------------------------------------------------------------------------------------------------------------------|----|
| 1 Compounds with one carbon atom .....                                                                                                                                        | 1  |
| 1.1 CH <sub>3</sub> Cl .....                                                                                                                                                  | 1  |
| 1.2 CH <sub>3</sub> I .....                                                                                                                                                   | 3  |
| 1.3 CH <sub>2</sub> F <sub>2</sub> .....                                                                                                                                      | 4  |
| 1.4 CH <sub>2</sub> Cl <sub>2</sub> .....                                                                                                                                     | 5  |
| 1.5 CH <sub>2</sub> ClBr .....                                                                                                                                                | 7  |
| 1.6 CH <sub>2</sub> Br <sub>2</sub> .....                                                                                                                                     | 8  |
| 1.7 CHCl <sub>3</sub> .....                                                                                                                                                   | 9  |
| 1.8 CHBr <sub>3</sub> .....                                                                                                                                                   | 11 |
| 1.9 CF <sub>2</sub> Cl <sub>2</sub> .....                                                                                                                                     | 12 |
| 1.10 CF <sub>4</sub> .....                                                                                                                                                    | 13 |
| 1.11 CCl <sub>4</sub> .....                                                                                                                                                   | 16 |
| 1.12 CCl <sub>2</sub> O, CCl <sub>3</sub> NO <sub>2</sub> , and CNCl .....                                                                                                    | 19 |
| 2 Compounds with two carbon atoms .....                                                                                                                                       | 20 |
| 2.1 CH <sub>3</sub> CH <sub>2</sub> Cl .....                                                                                                                                  | 20 |
| 2.2 CH <sub>3</sub> CH <sub>2</sub> Br .....                                                                                                                                  | 21 |
| 2.3 CH <sub>3</sub> CH <sub>2</sub> I .....                                                                                                                                   | 22 |
| 2.4 CH <sub>3</sub> CHF <sub>2</sub> .....                                                                                                                                    | 23 |
| 2.5 CH <sub>2</sub> ClCH <sub>2</sub> Cl .....                                                                                                                                | 24 |
| 2.6 CH <sub>2</sub> BrCH <sub>2</sub> Br .....                                                                                                                                | 25 |
| 2.7 CCl <sub>3</sub> CH <sub>3</sub> and CHCl <sub>2</sub> CH <sub>2</sub> Cl .....                                                                                           | 26 |
| 2.8 CHCl <sub>2</sub> CHCl <sub>2</sub> , CCl <sub>3</sub> CHCl <sub>2</sub> , and CH <sub>2</sub> ClCH <sub>2</sub> OH .....                                                 | 27 |
| 2.9 CH <sub>2</sub> =CHCl, CHCl=CHCl, CHCl=CCl <sub>2</sub> , and CCl <sub>2</sub> =CCl <sub>2</sub> .....                                                                    | 28 |
| 3 Compounds with three or more carbon atoms .....                                                                                                                             | 29 |
| 3.1 CH <sub>3</sub> CH <sub>2</sub> CH <sub>2</sub> Cl, CH <sub>3</sub> CH <sub>2</sub> CH <sub>2</sub> Br, and CH <sub>3</sub> CHBrCH <sub>3</sub> .....                     | 29 |
| 3.2 CH <sub>3</sub> CH <sub>2</sub> CH <sub>2</sub> I and CH <sub>3</sub> CHICH <sub>3</sub> .....                                                                            | 30 |
| 3.3 CH <sub>3</sub> CHClCH <sub>2</sub> Cl, CH <sub>3</sub> CHBrCH <sub>2</sub> Cl, CH <sub>3</sub> BrCHBrCH <sub>2</sub> Cl, and CH <sub>2</sub> =CHCH <sub>2</sub> Cl ..... | 31 |
| 3.4 1-chlorobutane and 2-chlorobutane .....                                                                                                                                   | 32 |
| 3.5 1-bromobutane and 2-bromobutane .....                                                                                                                                     | 33 |
| 3.6 1-iodobutane, 2-iodobutane, and dichloroethyl ether .....                                                                                                                 | 34 |
| 3.7 1-chloropentane and 1-bromo-3-methyl-butane .....                                                                                                                         | 35 |
| 3.8 1-fluorohexane, 1-bromohexane, 2-bromohexane, and 3-bromohexane .....                                                                                                     | 36 |

|                                                                                                      |    |
|------------------------------------------------------------------------------------------------------|----|
| 3.9 C <sub>7</sub> F <sub>18</sub> .....                                                             | 37 |
| 4 Aromatic compounds .....                                                                           | 38 |
| 4.1 fluorobenzene, chlorobenzene, and bromobenzene .....                                             | 38 |
| 4.2 hexafluorobenzene .....                                                                          | 40 |
| 4.3 4-fluorotoluene, 2-chlorotoluene, 3-chlorotoluene, 4-chlorotoluene, and benzyl<br>chloride ..... | 41 |

# 1 Compounds with one carbon atom

## 1.1 CH<sub>3</sub>Cl

| bath gas                         | reference. | $T$ | $P$ | $D_m$ | $D_e$ | $(D_m - D_e)/D_e$ (%) |
|----------------------------------|------------|-----|-----|-------|-------|-----------------------|
| air                              | [1]        | 298 | 760 | 109±2 | 99    | 10                    |
| CH <sub>4</sub>                  | [2]        | 298 | 740 | 108   | 113   | -4                    |
|                                  |            | 358 | 739 | 154   | 156   | -1                    |
|                                  |            | 418 | 745 | 208   | 205   | 2                     |
|                                  |            | 478 | 735 | 267   | 258   | 3                     |
|                                  |            | 298 | 739 | 107   | 113   | -5                    |
|                                  |            | 378 | 743 | 171   | 172   | -1                    |
|                                  |            | 438 | 733 | 228   | 222   | 3                     |
| SO <sub>2</sub>                  | [3]        | 303 | 760 | 53    | 65    | -19                   |
|                                  |            | 313 | 760 | 56    | 69    | -19                   |
|                                  |            | 323 | 760 | 58    | 73    | -20                   |
|                                  |            | 333 | 760 | 63    | 77    | -18                   |
| CH <sub>3</sub> OCH <sub>3</sub> | [3]        | 303 | 760 | 51    | 66    | -21                   |
|                                  |            | 313 | 760 | 55    | 69    | -21                   |
|                                  |            | 323 | 760 | 57    | 73    | -22                   |
|                                  |            | 333 | 760 | 62    | 77    | -20                   |

The diffusivity of CH<sub>3</sub>Cl in air at 298 K was measured by Cowie and Watts,<sup>[1]</sup> and the measured diffusivity is 10% larger than the estimated value.

Gotoh et al. measured the diffusivities of CH<sub>3</sub>Cl in CH<sub>4</sub> from 298 to 438 K,<sup>[2]</sup> and the differences between the measured and estimated diffusivities are <5% across the entire temperature range.

The diffusivities of CH<sub>3</sub>Cl in SO<sub>2</sub> and CH<sub>3</sub>OCH<sub>3</sub>, measured by Chakraborti and Gray,<sup>[3]</sup> are around 20% smaller than estimated values for temperatures in the range of 303 to 333 K.

### References:

- [1] Cowie, M., and Watts, H.: Diffusion of methane and chloromethanes in air, *Canadian Journal of Chemistry*, 49, 74-77, 1971.

- [2] Gotoh, S., Manner, M., Sorensen, J. P., and Stewart, W. E.: Binary diffusion-coefficients of low-density gases .1. Measurements by modified loschmidt method, *J. Chem. Eng. Data*, 19, 169-171, 1974.
- [3] Chakraborti, P. K., and Gray, P.: Diffusion coefficients in binary mixtures of polar gas-sulphur dioxide, dimethyl ether and methyl chlorine, *Transactions of the Faraday Society*, 62, 3331-3337, 1966.

## 1.2 CH<sub>3</sub>I

| bath gas | reference | $T$ | $P$ | $D_m$  | $D_e$ | $(D_m - D_e)/D_e$ (%) |
|----------|-----------|-----|-----|--------|-------|-----------------------|
| He       | [1]       | 431 | 760 | 595±12 | 602   | -1                    |

The diffusivity of CH<sub>3</sub>I in He, measured at 431 K by Fuller et al.,<sup>[1]</sup> is only 1% smaller than the estimated value.

### References:

- [1] Fuller, E. N., Ensley, K., and Giddings, J. C.: Diffusion of halogenated hydrocarbons in helium. Effect of structure on collision cross sections, *J. Phys. Chem.*, 73, 3679-3685, 1969.

### 1.3 CH<sub>2</sub>F<sub>2</sub>

| bath gas | reference | $T$ | $P$ | $D_m$        | $D_e$ | $(D_m - D_e)/D_e$ (%) |
|----------|-----------|-----|-----|--------------|-------|-----------------------|
| He       | [1]       | 431 | 760 | 664 $\pm$ 23 | 633   | 5                     |

The diffusivity of CH<sub>2</sub>F<sub>2</sub> in He, measured at 431 K by Fuller et al.,<sup>[1]</sup> is 5% larger than the estimated value.

#### References:

- [1] Fuller, E. N., Ensley, K., and Giddings, J. C.: Diffusion of halogenated hydrocarbons in helium. Effect of structure on collision cross sections, *J. Phys. Chem.*, 73, 3679-3685, 1969.

## 1.4 CH<sub>2</sub>Cl<sub>2</sub>

| bath gas | reference | $T$ | $P$ | $D_m$ | $D_e$ | $(D_m - D_e)/D_e$ (%) |
|----------|-----------|-----|-----|-------|-------|-----------------------|
| He       | [1]       | 428 | 760 | 570±7 | 552   | 3                     |
| air      | [2]       | 298 | 760 | 79±4  | 79    | 0                     |
|          | [3]       | 298 | 760 | 79±4  | 79    | -1                    |
|          | [4]       | 288 | 760 | 76    | 75    | 1                     |
|          |           | 298 | 760 | 79    | 80    | 0                     |
|          |           | 308 | 760 | 83    | 84    | -1                    |
| Kr       | [5]       | 278 | 16  | 39    | 48    | -17                   |
|          |           | 288 | 18  | 42    | 50    | -17                   |
|          |           | 303 | 21  | 47    | 55    | -15                   |
|          |           | 318 | 24  | 51    | 60    | -15                   |

The diffusivity of CH<sub>2</sub>Cl<sub>2</sub> in He at 428 K, measured Fuller et al.,<sup>[1]</sup> is 3% larger than the estimated value.

The diffusivities of CH<sub>2</sub>Cl<sub>2</sub> in air, measured at 298 K by Cowie and Watts<sup>[2]</sup> and by Lugg<sup>[3]</sup> and from 288 to 308 K by Watts,<sup>[4]</sup> show excellent agreement with estimated values, with difference being 1% or smaller.

The diffusivities of CH<sub>2</sub>Cl<sub>2</sub> in Kr, measured by Singh and Srivastava from 278 to 318 K,<sup>[5]</sup> are 15% to 17% smaller than the estimated values.

### References:

- [1] Fuller, E. N., Ensley, K., and Giddings, J. C.: Diffusion of halogenated hydrocarbons in helium. Effect of structure on collision cross sections, *J. Phys. Chem.*, 73, 3679-3685, 1969.
- [2] Cowie, M., and Watts, H.: Diffusion of methane and chloromethanes in air, *Canadian Journal of Chemistry*, 49, 74-77, 1971.
- [3] Lugg, G. A.: Diffusion coefficients of some organic and other vapors in air, *Analytical Chemistry*, 40, 1072-1077, 1968.
- [4] Watts, H.: Temperature dependence of diffusion of carbon tetrachloride, chloroform and methylene chloride vapors in air by a rate of evaporation method, *Canadian Journal of Chemistry*, 49, 67-73, 1971.



- [5], B. N.: Unlike interactions and binary diffusion in polar-nonpolar mixtures-krypton-methylene chloride and krypton-ethylchloride, *International Journal of Heat and Mass Transfer*, 11, 1771-1778, 1968.

## 1.5 CH<sub>2</sub>ClBr

| bath gas | reference | $T$ | $P$ | $D_m$ | $D_e$ | $(D_m - D_e)/D_e$ (%) |
|----------|-----------|-----|-----|-------|-------|-----------------------|
| air      | [1]       | 298 | 760 | 72±1  | 81    | -10                   |

The measured diffusivity of CH<sub>2</sub>ClBr in air at 298 K <sup>[1]</sup> is 10% smaller than the estimated value.

### References:

- [1] Lugg, G. A.: Diffusion coefficients of some organic and other vapors in air, *Analytical Chemistry*, 40, 1072-1077, 1968.

## 1.6 CH<sub>2</sub>Br<sub>2</sub>

| bath gas | reference | $T$ | $P$ | $D_m$ | $D_e$ | $(D_m - D_e)/D_e$ (%) |
|----------|-----------|-----|-----|-------|-------|-----------------------|
| He       | [1]       | 428 | 760 | 505±5 | 550   | -8                    |

The measured diffusivity of CH<sub>2</sub>Br<sub>2</sub> in He at 428 K <sup>[1]</sup> is 8% smaller than the estimated value.

### References:

- [1] Fuller, E. N., Ensley, K., and Giddings, J. C.: Diffusion of halogenated hydrocarbons in helium. Effect of structure on collision cross sections, *J. Phys. Chem.*, 73, 3679-3685, 1969.

## 1.7 $\text{CHCl}_3$

| bath gas                                                     | reference | $T$ | $P$ | $D_m$       | $D_e$ | $(D_m - D_e)/D_e$ (%) |
|--------------------------------------------------------------|-----------|-----|-----|-------------|-------|-----------------------|
| He                                                           | [1]       | 429 | 760 | $474 \pm 9$ | 483   | -2                    |
| N <sub>2</sub>                                               | [2]       | 361 | 760 | 103         | 99    | 3                     |
|                                                              |           | 383 | 760 | 109         | 110   | -1                    |
|                                                              |           | 403 | 760 | 122         | 120   | 2                     |
|                                                              |           | 418 | 760 | 131         | 128   | 3                     |
| air                                                          | [3]       | 308 | 760 | 77          | 73    | 5                     |
|                                                              | [4]       | 298 | 760 | $67 \pm 1$  | 69    | -2                    |
|                                                              | [5]       | 323 | 760 | $83 \pm 2$  | 79    | 5                     |
|                                                              | [6]       | 298 | 760 | $66 \pm 1$  | 69    | -5                    |
|                                                              | [7]       | 298 | 760 | 69          | 69    | 0                     |
|                                                              |           | 308 | 760 | 73          | 73    | 0                     |
|                                                              |           | 318 | 760 | 77          | 77    | 0                     |
|                                                              |           | 328 | 760 | 81          | 81    | 0                     |
| CO <sub>2</sub>                                              | [2]       | 363 | 760 | 84          | 76    | 10                    |
|                                                              |           | 383 | 760 | 91          | 84    | 9                     |
|                                                              |           | 404 | 760 | 98          | 92    | 7                     |
| Kr                                                           | [8]       | 284 | 11  | 36          | 41    | -12                   |
|                                                              |           | 293 | 11  | 38          | 43    | -13                   |
|                                                              |           | 303 | 13  | 41          | 46    | -12                   |
|                                                              |           | 313 | 13  | 43          | 49    | -12                   |
| C <sub>2</sub> H <sub>5</sub> OC <sub>2</sub> H <sub>5</sub> | [9]       | 293 | 760 | 22          | 30    | -25                   |

The diffusivity of  $\text{CHCl}_3$  in He at 429 K, measured by Fuller et al.,<sup>[1]</sup> is 2% smaller than the estimated value.

Nagata and Hasegawa investigated the temperature dependence of diffusivities of  $\text{CHCl}_3$  in N<sub>2</sub> from 361 to 418 K,<sup>[2]</sup> and differences between the measured and estimated values are not larger than 3%.

Five studies measured the diffusivities of  $\text{CHCl}_3$  in air at different temperatures from 298 to 328 K.<sup>[3-7]</sup> Differences between the measured and estimated diffusivities are around 5% or smaller.

Nagata and Hasegawa measured the diffusivities of  $\text{CHCl}_3$  in CO<sub>2</sub> at 363, 383, and 404 K.<sup>[2]</sup> The differences between the measured and estimated diffusivities are around 10% or smaller.

Srivastava and Saran measured the diffusivities of  $\text{CHCl}_3$  in Kr at 284, 293, 303, and 313 K,<sup>[8]</sup> and the measured diffusivities are around 13% smaller than the estimated values.

The diffusivity of  $\text{CHCl}_3$  in  $\text{C}_2\text{H}_5\text{OC}_2\text{H}_5$  at 293 K, measured by Weissman,<sup>[9]</sup> is 25% smaller than the estimated value.

## References:

- [1] Fuller, E. N., Ensley, K., and Giddings, J. C.: Diffusion of halogenated hydrocarbons in helium. Effect of structure on collision cross sections, *J. Phys. Chem.*, 73, 3679-3685, 1969.
- [2] Nagata, I., and Hasegawa, T.: Gaseous interdiffusion coefficients, *J. Chem. Engng. Japan*, 3, 143-145, 1970.
- [3] Getzinger, R. W., and Wilke, C. R.: An experimental study of nonequimolar diffusion in ternary gas mixtures, *Aiche J.*, 13, 577-580, 1967.
- [4] Lugg, G. A.: Diffusion coefficients of some organic and other vapors in air, *Analytical Chemistry*, 40, 1072-1077, 1968.
- [5] Mrazek, R. V., Wicks, C. E., and Prabhu, K. N. S.: Dependence of diffusion coefficient on composition in binary gaseous systems, *J. Chem. Eng. Data*, 13, 508-510, 1968.
- [6] Cowie, M., and Watts, H.: Diffusion of methane and chloromethanes in air, *Canadian Journal of Chemistry*, 49, 74-77, 1971.
- [7] Watts, H.: Temperature dependence of diffusion of carbon tetrachloride, chloroform and methylene chloride vapors in air by a rate of evaporation method, *Canadian Journal of Chemistry*, 49, 67-73, 1971.
- [8] Srivastava, B. N., and Saran, A.: Mutual diffusion studies in krypton-acetone and krypton-chloroform systems, *Physica*, 32, 110-118, 1966.
- [9] Weissman, S.: Estimation of diffusion coefficients from viscosity measurements-polar + polyatomic gases, *J. Chem. Phys.*, 40, 3397-3406, 1964.

## 1.8 CHBr<sub>3</sub>

| bath gas | reference | $T$ | $P$ | $D_m$ | $D_e$ | $(D_m - D_e)/D_e$ (%) |
|----------|-----------|-----|-----|-------|-------|-----------------------|
| air      | [1]       | 298 | 760 | 58±1  | 71    | -18                   |

The measured diffusivity of CHBr<sub>3</sub> in air at 298 K <sup>[1]</sup> is 18% smaller than the estimated value.

### References:

- [1] Lugg, G. A.: Diffusion coefficients of some organic and other vapors in air, *Analytical Chemistry*, 40, 1072-1077, 1968.

## 1.9 CF<sub>2</sub>Cl<sub>2</sub>

| bath gas             | reference | $T$ | $P$ | $D_m$ | $D_e$ | $(D_m - D_e)/D_e$ (%) |
|----------------------|-----------|-----|-----|-------|-------|-----------------------|
| air                  | [1]       | 298 | 760 | 72±3  | 67    | 7                     |
| H <sub>2</sub> O     | [2]       | 298 | 760 | 80    | 90    | -11                   |
| ethanol              | [2]       | 298 | 760 | 36    | 43    | -15                   |
| benzene              | [2]       | 298 | 760 | 29    | 28    | 4                     |
| di-n-butyl phthalate | [3]       | 293 | 760 | 9.6   | 13.5  | -29                   |
|                      |           | 303 | 760 | 10.6  | 14.3  | -26                   |

The differences between the measured diffusivity of CF<sub>2</sub>Cl<sub>2</sub> in air,<sup>[1]</sup> H<sub>2</sub>O,<sup>[2]</sup> ethanol,<sup>[2]</sup> and benzene<sup>[2]</sup> at 295 K and estimated values are 7%, 11%, 14%, and 4%, respectively.

Briks et al.<sup>[3]</sup> measured the diffusivities of CF<sub>2</sub>Cl<sub>2</sub> in di-n-butyl phthalate at 293 and 303 K, and the measured diffusivities are 29% and 26% smaller than the measured values.

### References:

- [1] Barr, R. F., and Watts, H.: Diffusion of some organic and inorganic compounds in air, *J. Chem. Eng. Data*, 17, 45-46, 1972.
- [2] Lee, C. Y., and Wilke, C. R.: Measurements of vapor diffusion coefficient, *Industrial and Engineering Chemistry*, 46, 2381-2387, 1954.
- [3] Birks, J., and Bradley, R. S.: The rate of evaporation of droplets. 2. the influence of changes of temperature and of the surrounding gas on the rate of evaporation of drops of di-normal-butyl phthalate, *Proceedings of the Royal Society of London Series a-Mathematical and Physical Sciences*, 198, 226-239, 1949.

### 1.10 CF<sub>4</sub>

| bath gas          | reference | $T$ | $P$ | $D_m$ | $D_e$ | $(D_m - D_e)/D_e$ (%) |
|-------------------|-----------|-----|-----|-------|-------|-----------------------|
| CH <sub>4</sub>   | [1]       | 298 | 760 | 92.7  | 87.6  | 6                     |
|                   |           | 353 | 760 | 126.9 | 117.5 | 8                     |
|                   |           | 383 | 760 | 145.9 | 135.5 | 8                     |
| SF <sub>6</sub>   | [2]       | 303 | 760 | 36.3  | 32.7  | 11                    |
|                   |           | 313 | 760 | 38.5  | 34.6  | 11                    |
|                   |           | 329 | 760 | 42.1  | 37.8  | 12                    |
|                   |           | 342 | 760 | 45.2  | 40.4  | 12                    |
| n-hexane          | [3]       | 283 | 760 | 29.6  | 26.6  | 11                    |
|                   |           | 298 | 760 | 33.1  | 29.1  | 13                    |
|                   |           | 313 | 760 | 36.6  | 31.8  | 15                    |
|                   |           | 328 | 760 | 39.7  | 34.5  | 15                    |
| cyclohexane       | [4]       | 283 | 760 | 30.9  | 27.1  | 14                    |
|                   |           | 298 | 760 | 33.7  | 29.7  | 14                    |
|                   |           | 313 | 760 | 37.3  | 32.4  | 15                    |
|                   |           | 328 | 760 | 40.2  | 35.1  | 14                    |
|                   |           | 343 | 760 | 43.6  | 38.0  | 15                    |
| benzene           | [4]       | 283 | 760 | 34.7  | 30.8  | 13                    |
|                   |           | 298 | 760 | 37.5  | 33.7  | 11                    |
|                   |           | 313 | 760 | 42.1  | 36.7  | 15                    |
|                   |           | 328 | 760 | 45.4  | 39.9  | 14                    |
|                   |           | 343 | 760 | 49.2  | 43.1  | 14                    |
| n-heptane         | [3]       | 283 | 760 | 28.5  | 24.3  | 17                    |
|                   |           | 298 | 760 | 29.4  | 26.6  | 11                    |
|                   |           | 313 | 760 | 32.3  | 29.0  | 11                    |
|                   |           | 328 | 760 | 35.7  | 31.5  | 14                    |
|                   |           | 343 | 760 | 38.3  | 34.0  | 13                    |
| methylcyclohexane | [4]       | 283 | 760 | 25.9  | 24.7  | 5                     |
|                   |           | 298 | 760 | 29.2  | 27.0  | 8                     |
|                   |           | 313 | 760 | 33.7  | 29.5  | 14                    |
|                   |           | 328 | 760 | 36.1  | 32.0  | 13                    |
|                   |           | 343 | 760 | 39.2  | 34.6  | 13                    |



|         |     |     |     |      |      |    |
|---------|-----|-----|-----|------|------|----|
| toluene | [4] | 283 | 760 | 29.4 | 27.5 | 7  |
|         |     | 298 | 760 | 33.1 | 30.1 | 10 |
|         |     | 313 | 760 | 36.6 | 32.8 | 11 |
|         |     | 328 | 760 | 40.0 | 35.6 | 12 |
|         |     | 343 | 760 | 43.9 | 38.5 | 14 |
| octane  | [3] | 283 | 760 | 20.9 | 22.5 | -7 |
|         |     | 283 | 760 | 24.1 | 22.5 | 7  |
|         |     | 298 | 760 | 27.4 | 24.6 | 12 |
|         |     | 298 | 760 | 27.7 | 24.6 | 12 |
|         |     | 313 | 760 | 31.8 | 26.8 | 19 |
|         |     | 313 | 760 | 29.6 | 26.8 | 11 |
|         |     | 328 | 760 | 33.1 | 29.1 | 14 |
|         |     | 328 | 760 | 32.7 | 29.1 | 12 |
|         |     | 343 | 760 | 35.2 | 31.5 | 12 |
|         |     | 343 | 760 | 34.4 | 31.5 | 9  |

Mueller and Cahill <sup>[1]</sup> measured the diffusivities of CF<sub>4</sub> in CH<sub>4</sub> from 298-383 K, and the differences between the measured and estimated diffusivities are around 8% or smaller.

Raw and Tang <sup>[2]</sup> measured the diffusivities of CF<sub>4</sub> in SF<sub>6</sub> from 303 to 342 K, and the differences between the measured and estimated diffusivities are around 12%.

Wilhelm and Battino <sup>[3]</sup> measured the diffusivities of CF<sub>4</sub> in n-haxane from 283 to 328 K, and the measured diffusivities are 11% to 15% larger than the estimated values.

Wilhelm et al. <sup>[4]</sup> measured the diffusivities of CF<sub>4</sub> in cyclohexane from 283 to 343 K, and the measured diffusivities are ~15% larger than the estimated values.

The diffusivities of CF<sub>4</sub> in benzene are measured by Wilhelm from 283 to 343 K, <sup>[4]</sup> and the differences between the measured and estimated diffusivities are around 15% or smaller.

Wilhelm and Battino <sup>[3]</sup> measured the diffusivities of CF<sub>4</sub> in n-heptane from 283 to 343 K, and the differences between the measured and estimated diffusivities are 17% or smaller.

Wilhelm et al. <sup>[4]</sup> measured the diffusivities of CF<sub>4</sub> in methylcyclohexane from 283 to 343 K, and the measured diffusivities are 5% to 14% larger than the estimated values.

Wilhelm et al. <sup>[4]</sup> measured the diffusivities of CF<sub>4</sub> in toluene from 283 to 343 K, and the differences between the measured and estimated values are 14% or smaller.

Wilhelm and Battino <sup>[3]</sup> measured the diffusivities of CF<sub>4</sub> in octane from 283 to 343 K, and the difference between the measured and estimated diffusivities are 19% or smaller.

#### References:

- [1] Mueller, C. R., and Cahill, R. W.: Mass spectrometric measurement of diffusion coefficients, *J. Chem. Phys.*, 40, 651-654, 1964.
- [2] Raw, C. J. G., and Tang, H.: Viscosity and diffusion coefficients of gaseous sulfur hexafluoride-carbon tetrafluoride mixtures, *J. Chem. Phys.*, 39, 2616-2618, 1963.
- [3] Wilhelm, E., and Battino, R.: Binary gaseous diffusion-coefficients .1. methane and carbon tetrafluoride with hexane, heptane, octane, and 2,2,4-trimethylpentane at one-atmosphere pressure at 10-70 degrees c, *J. Chem. Eng. Data*, 17, 187-189, 1972.
- [4] Wilhelm, E., Battino, R., and Carpenter, R.: Binary gaseous diffusion-coefficients .2. methane and carbon tetrafluoride with cyclohexane, methylcyclohexane, benzene, and toluene at 1atm at 10-70 degrees c, *J. Chem. Eng. Data*, 19, 245-246, 1974.

## 1.11 CCl<sub>4</sub>

| bath gas                        | reference | $T$ | $P$ | $D_m$ | $D_e$ | $(D_m - D_e)/D_e$ (%) |
|---------------------------------|-----------|-----|-----|-------|-------|-----------------------|
| N <sub>2</sub>                  | [1]       | 364 | 760 | 86    | 90    | -5                    |
|                                 |           | 383 | 760 | 94    | 99    | -5                    |
|                                 |           | 403 | 760 | 102   | 108   | -6                    |
|                                 |           | 423 | 760 | 112   | 117   | -5                    |
|                                 | [2]       | 353 | 760 | 84    | 86    | -2                    |
| air                             | [3]       | 298 | 760 | 63±1  | 62    | 2                     |
|                                 | [4]       | 298 | 760 | 58±1  | 62    | -7                    |
|                                 | [5]       | 308 | 760 | 68    | 65    | 4                     |
|                                 | [6]       | 295 | 740 | 58    | 61    | -5                    |
|                                 |           | 296 | 743 | 57    | 61    | -6                    |
|                                 | [7]       | 298 | 760 | 59    | 62    | -5                    |
|                                 |           | 308 | 760 | 63    | 65    | -4                    |
|                                 |           | 318 | 760 | 66    | 69    | -4                    |
|                                 |           | 328 | 760 | 70    | 73    | -4                    |
|                                 |           | 338 | 760 | 74    | 77    | -4                    |
|                                 |           | 348 | 760 | 78    | 81    | -4                    |
|                                 | [8]       | 295 | 762 | 61    | 61    | 1                     |
|                                 | [9]       | 313 | 760 | 67    | 67    | 1                     |
| CO <sub>2</sub>                 | [1]       | 363 | 760 | 65    | 68    | -5                    |
|                                 |           | 384 | 760 | 71    | 75    | -6                    |
|                                 |           | 403 | 760 | 76    | 82    | -7                    |
|                                 |           | 423 | 760 | 84    | 89    | -5                    |
| benzene                         | [10]      | 293 | 760 | 19±1  | 17    | 12                    |
| CH <sub>2</sub> Cl <sub>2</sub> | [10]      | 293 | 760 | 22±1  | 29    | -26                   |
|                                 |           | 353 | 760 | 32±1  | 40    | -21                   |
|                                 |           | 413 | 760 | 42±4  | 53    | -22                   |
| CHCl <sub>3</sub>               | [10]      | 293 | 760 | 20±1  | 24    | -17                   |

The diffusivities of CCl<sub>4</sub> in N<sub>2</sub> were measured by Nagata and Hasegawa <sup>[1]</sup> from 364 to 423 K and by Arinikar <sup>[2]</sup> at 353 K. The measured diffusivities are 2% to 6% smaller than the estimated values.

Five studies measured the diffusivities of  $\text{CCl}_4$  in air at 295-298 K, [3, 4, 6-8] and the differences between the measured and estimated diffusivities are 7% or smaller. Getzinger and Wilke [5] and Richardson [9] measured the diffusivities of  $\text{CCl}_4$  in air at 308 and 313 K, and the differences between the measured and estimated values are 4% or smaller. The temperature dependence of diffusivities of  $\text{CCl}_4$  in air was investigated from 298 to 348 K by Watts. [7] The differences between the measured and estimated diffusivities are 5% or smaller across the entire temperature range investigated.

Nagata and Hasegawa [1] measured the diffusivities of  $\text{CCl}_4$  in  $\text{CO}_2$  from 363 to 423 K, and the measured diffusivities are around 6% smaller than the estimated values.

Weissman [10] measured the diffusivity of  $\text{CCl}_4$  in benzene at 293 K, and the measured diffusivity is 12% larger than the estimated value.

Weissman [10] measured the diffusivities of  $\text{CCl}_4$  in  $\text{CH}_2\text{Cl}_2$  at 293, 353, and 413 K, and the measured diffusivities are all around 25% smaller than estimated values.

The diffusivity of  $\text{CCl}_4$  in  $\text{CHCl}_3$  was measured by Weissman at 293 K, [10] and the measured diffusivity is 17% smaller than the estimated value.

## References:

- [1] Nagata, I., and Hasegawa, T.: Gaseous interdiffusion coefficients, *J. Chem. Engng. Japan*, 3, 143-145, 1970.
- [2] Arnikaar, H. J., Rao, T. S., and Karmarkar, K. H.: Eletrodeless discharge as detector in gas chromatography. 3. study of inter-diffusion of gases, *International Journal of Electronics*, 22, 381-385, 1967.
- [3] Lugg, G. A.: Diffusion coefficients of some organic and other vapors in air, *Analytical Chemistry*, 40, 1072-1077, 1968.
- [4] Cowie, M., and Watts, H.: Diffusion of methane and chloromethanes in air, *Canadian Journal of Chemistry*, 49, 74-77, 1971.
- [5] Getzinger, R. W., and Wilke, C. R.: An experimental study of nonequimolal diffusion in ternary gas mixtures, *Aiche J.*, 13, 577-580, 1967.
- [6] Grob, A. K., and Elwakil, M. M.: An interferometric technique for measuring binary diffusion coefficients, *Journal of Heat Transfer*, 91, 259-265, 1969.

- [7] Watts, H.: Temperature dependence of diffusion of carbon tetrachloride, chloroform and methylene chloride vapors in air by a rate of evaporation method, *Canadian Journal of Chemistry*, 49, 67-73, 1971.
- [8] Pryde, J. A., and Pryde, E. A.: A simple quantitative diffusion experiment, *Physics Education*, 2, 311-314, 1967.
- [9] Richardson, J. F.: The evaporation of two-component liquid mixtures, *Chem. Eng. Sci.*, 10, 234-242, 1959.
- [10] Weissman, S.: Estimation of diffusion coefficients from viscosity measurements-polar + polyatomic gases, *J. Chem. Phys.*, 40, 3397-3406, 1964.

### 1.12 CCl<sub>2</sub>O, CCl<sub>3</sub>NO<sub>2</sub>, and CNCl

| species                          | bath gas | reference | $T$ | $P$ | $D_m$ | $D_e$ | $(D_m - D_e)/D_e$ (%) |
|----------------------------------|----------|-----------|-----|-----|-------|-------|-----------------------|
| CCl <sub>2</sub> O               | air      | [1]       | 273 | 760 | 72    | 66    | 9                     |
| CCl <sub>3</sub> NO <sub>2</sub> | air      | [1]       | 298 | 760 | 67    | 63    | 7                     |
|                                  |          | [2]       | 298 | 760 | 62±1  | 63    | -2                    |
| CNCl                             | air      | [1]       | 273 | 760 | 84    | 84    | 1                     |

The measured diffusivities in air are 9% larger than the estimated value for CCl<sub>2</sub>O and 1% larger for CNCl.<sup>[1]</sup>

Two studies measured the diffusivities of CCl<sub>3</sub>NO<sub>2</sub> in air at 298 K, and the measured values are 7% larger<sup>[1]</sup> and 2% smaller<sup>[2]</sup> than the estimated ones.

#### References:

- [1] Klotz, I. M., and Miller, D. K.: Diffusion coefficients and molecular radii of hydrogen cyanide, cyanogen chloride, phosgene and chloropicrin, J. Am. Chem. Soc., 69, 2557-2558, 1947.
- [2] Lugg, G. A.: Diffusion coefficients of some organic and other vapors in air, Analytical Chemistry, 40, 1072-1077, 1968.

## 2 Compounds with two carbon atoms

### 2.1 CH<sub>3</sub>CH<sub>2</sub>Cl

| bath gas           | reference | $T$ | $P$ | $D_m$ | $D_e$ | $(D_m - D_e)/D_e$ (%) |
|--------------------|-----------|-----|-----|-------|-------|-----------------------|
| CH <sub>3</sub> Cl | [1]       | 298 | 731 | 43    | 54    | -22                   |
|                    |           | 298 | 736 | 42    | 55    | -22                   |
|                    |           | 358 | 742 | 64    | 75    | -14                   |
|                    |           | 378 | 741 | 74    | 83    | -10                   |
|                    |           | 419 | 741 | 90    | 99    | -9                    |
|                    |           | 438 | 731 | 98    | 107   | -9                    |
| Kr                 | [2]       | 275 | 21  | 45    | 50    | -9                    |
|                    |           | 288 | 28  | 55    | 54    | 2                     |
|                    |           | 303 | 21  | 54    | 59    | -7                    |
|                    |           | 318 | 24  | 60    | 64    | -6                    |

Gotoh et al.<sup>[1]</sup> measured the diffusivities in CH<sub>3</sub>Cl from 298 to 438 K, and the differences between the measured and estimated diffusivities are around 22% or less.

The diffusivities of CH<sub>3</sub>CH<sub>2</sub>Cl in Kr were measured from 275 to 318 K by Singh and Srivastava,<sup>[2]</sup> and the differences between the measured and estimated diffusivities are smaller than 10%.

#### References:

- [1] Gotoh, S., Manner, M., Sorensen, J. P., and Stewart, W. E.: Binary diffusion-coefficients of low-density gases .1. Measurements by modified loschmidt method, *J. Chem. Eng. Data*, 19, 169-171, 1974.
- [2] Singh, Y., and Srivastava, B. N.: Unlike interactions and binary diffusion in polar-nonpolar mixtures- krypton-methylene chloride and krypton-ethylchloride, *International Journal of Heat and Mass Transfer*, 11, 1771-1778, 1968.

## 2.2 CH<sub>3</sub>CH<sub>2</sub>Br

| bath gas | reference | $T$ | $P$ | $D_m$ | $D_e$ | $(D_m - D_e)/D_e$ (%) |
|----------|-----------|-----|-----|-------|-------|-----------------------|
| He       | [1]       | 428 | 760 | 562±8 | 548   | 3                     |
| Air      | [2]       | 298 | 760 | 75±1  | 84    | -11                   |
|          | [3]       | 295 | 745 | 80    | 83    | -4                    |
|          |           | 295 | 729 | 79    | 83    | -5                    |
|          |           | 296 | 736 | 78    | 83    | -6                    |

The diffusivity of CH<sub>3</sub>CH<sub>2</sub>Br in He at 428 K, measured by Fuller et al.,<sup>[1]</sup> is 3% larger than the estimated value.

Lugg<sup>[2]</sup> and Grob and Elwakil<sup>[3]</sup> measured the diffusivities of CH<sub>3</sub>CH<sub>2</sub>Br in air at around room temperature, and the differences between measured and estimated diffusivities are 4% to 6%.

### References:

- [1] Fuller, E. N., Ensley, K., and Giddings, J. C.: Diffusion of halogenated hydrocarbons in helium. Effect of structure on collision cross sections, *J. Phys. Chem.*, 73, 3679-3685, 1969.
- [2] Lugg, G. A.: Diffusion coefficients of some organic and other vapors in air, *Analytical Chemistry*, 40, 1072-1077, 1968.
- [3] Grob, A. K., and Elwakil, M. M.: An interferometric technique for measuring binary diffusion coefficients, *Journal of Heat Transfer*, 91, 259-265, 1969.



### 2.3 CH<sub>3</sub>CH<sub>2</sub>I

| bath gas | reference | T   | P   | Dm     | De  | (Dm-De)/De |
|----------|-----------|-----|-----|--------|-----|------------|
| air      | [1]       | 295 | 736 | 72     | 69  | 4          |
|          |           | 295 | 730 | 72     | 69  | 4          |
|          |           | 295 | 737 | 71     | 69  | 3          |
| He       | [2]       | 428 | 760 | 492±10 | 506 | -3         |

The average diffusivity of CH<sub>3</sub>CH<sub>2</sub>I in air at 295 K, measured by Grob and Elwakil,<sup>[1]</sup> is ~3% larger than the estimated value.

The diffusivity of CH<sub>3</sub>CH<sub>2</sub>I in He at 428 K, measured by Fuller et al.,<sup>[2]</sup> is 3% smaller than the estimated value.

#### References:

- [1] Grob, A. K., and Elwakil, M. M.: An interferometric technique for measuring binary diffusion coefficients, *Journal of Heat Transfer*, 91, 259-265, 1969.
- [2] Fuller, E. N., Ensley, K., and Giddings, J. C.: Diffusion of halogenated hydrocarbons in helium. Effect of structure on collision cross sections, *J. Phys. Chem.*, 73, 3679-3685, 1969.

## 2.4 CH<sub>3</sub>CHF<sub>2</sub>

| bath gas | reference | $T$ | $P$ | $D_m$  | $D_e$ | $(D_m - D_e)/D_e$ (%) |
|----------|-----------|-----|-----|--------|-------|-----------------------|
| He       | [1]       | 430 | 760 | 573±11 | 527   | 9                     |

The diffusivity in He at 430 K, measured by Fuller et al.,<sup>[1]</sup> is 9% larger than the estimated value.

### References:

- [1] Fuller, E. N., Ensley, K., and Giddings, J. C.: Diffusion of halogenated hydrocarbons in helium. Effect of structure on collision cross sections, *J. Phys. Chem.*, 73, 3679-3685, 1969.

## 2.5 CH<sub>2</sub>ClCH<sub>2</sub>Cl

| bath gas | reference | $T$ | $P$ | $D_m$ | $D_e$ | $(D_m - D_e)/D_e$ (%) |
|----------|-----------|-----|-----|-------|-------|-----------------------|
| He       | [1]       | 427 | 760 | 519±5 | 476   | 9                     |
| air      | [2]       | 295 | 745 | 67    | 68    | -2                    |
|          |           | 295 | 738 | 67    | 68    | -1                    |
|          |           | 295 | 742 | 66    | 68    | -4                    |
|          | [3]       | 298 | 760 | 70±1  | 70    | 0                     |
|          |           | 298 | 760 | 69±1  | 70    | -1                    |

The diffusivity of CH<sub>2</sub>ClCH<sub>2</sub>Cl in He at 427 K, measured by Fuller et al.,<sup>[1]</sup> is 9% larger than the estimated value.

The diffusivities of CH<sub>2</sub>ClCH<sub>2</sub>Cl in air were measured by two studies at around room temperature,<sup>[2,3]</sup> and the differences between the measured and estimated values are 4% or less.

### References:

- [1] Fuller, E. N., Ensley, K., and Giddings, J. C.: Diffusion of halogenated hydrocarbons in helium. Effect of structure on collision cross sections, *J. Phys. Chem.*, 73, 3679-3685, 1969.
- [2] Grob, A. K., and Elwakil, M. M.: An interferometric technique for measuring binary diffusion coefficients, *Journal of Heat Transfer*, 91, 259-265, 1969.
- [3] Lugg, G. A.: Diffusion coefficients of some organic and other vapors in air, *Analytical Chemistry*, 40, 1072-1077, 1968.

## 2.6 CH<sub>2</sub>BrCH<sub>2</sub>Br

| bath gas | reference | $T$ | $P$ | $D_m$ | $D_e$ | $(D_m - D_e)/D_e$ (%) |
|----------|-----------|-----|-----|-------|-------|-----------------------|
| air      | [1]       | 298 | 760 | 63±1  | 72    | -13                   |

The diffusivity of CH<sub>2</sub>BrCH<sub>2</sub>Br in air at 298 K, measured by Lugg,<sup>[1]</sup> is 13% smaller than the estimated value.

### References:

- [1] Lugg, G. A.: Diffusion coefficients of some organic and other vapors in air, *Analytical Chemistry*, 40, 1072-1077, 1968.

## 2.7 CCl<sub>3</sub>CH<sub>3</sub> and CHCl<sub>2</sub>CH<sub>2</sub>Cl

| species                              | reference | bath gas | $T$ | $P$ | $D_m$ | $D_e$ | $(D_m - D_e)/D_e$ (%) |
|--------------------------------------|-----------|----------|-----|-----|-------|-------|-----------------------|
| CCl <sub>3</sub> CH <sub>3</sub>     | [1]       | air      | 298 | 760 | 60±1  | 62    | -2                    |
| CHCl <sub>2</sub> CH <sub>2</sub> Cl | [1]       | air      | 298 | 760 | 60±1  | 62    | -2                    |

Lugg <sup>[1]</sup> measured the diffusivities of CCl<sub>3</sub>CH<sub>3</sub> and CHCl<sub>2</sub>CH<sub>2</sub>Cl in air at 298 K, and the measured diffusivities are both 2% smaller than the estimated values.

### References:

- [1] Lugg, G. A.: Diffusion coefficients of some organic and other vapors in air, *Analytical Chemistry*, 40, 1072-1077, 1968.

## 2.8 $\text{CHCl}_2\text{CHCl}_2$ , $\text{CCl}_3\text{CHCl}_2$ , and $\text{CH}_2\text{ClCH}_2\text{OH}$

| species                             | bath gas | reference | $T$ | $P$ | $D_m$      | $D_e$ | $(D_m - D_e)/D_e$ (%) |
|-------------------------------------|----------|-----------|-----|-----|------------|-------|-----------------------|
| $\text{CHCl}_2\text{CHCl}_2$        | air      | [1]       | 298 | 760 | $55 \pm 1$ | 57    | -2                    |
| $\text{CCl}_3\text{CHCl}_2$         | air      | [1]       | 298 | 760 | $51 \pm 1$ | 53    | -2                    |
| $\text{CH}_2\text{ClCH}_2\text{OH}$ | air      | [1]       | 298 | 760 | $73 \pm 1$ | 76    | -2                    |

Lugg <sup>[1]</sup> measured the diffusivities of  $\text{CHCl}_2\text{CHCl}_2$ ,  $\text{CCl}_3\text{CHCl}_2$ , and  $\text{CH}_2\text{ClCH}_2\text{OH}$  in air at 298 K, and the measured diffusivities are all 2% smaller than the estimated values.

### References:

- [1] Lugg, G. A.: Diffusion coefficients of some organic and other vapors in air, *Analytical Chemistry*, 40, 1072-1077, 1968.

## 2.9 CH<sub>2</sub>=CHCl, CHCl=CHCl, CHCl=CCl<sub>2</sub>, and CCl<sub>2</sub>=CCl<sub>2</sub>

| formula                            | bath gas | reference | $T$ | $P$ | $D_m$ | $D_e$ | $(D_m-D_e)/D_e$ (%) |
|------------------------------------|----------|-----------|-----|-----|-------|-------|---------------------|
| CH <sub>2</sub> =CHCl              | air      | [1]       | 298 | 760 | 93±4  | 85    | -2                  |
| CHCl=CHCl                          | air      | [1]       | 298 | 760 | 87±7  | 71    | -2                  |
| CHCl=CCl <sub>2</sub>              | air      | [2]       | 298 | 760 | 67±1  | 63    | -2                  |
| CCl <sub>2</sub> =CCl <sub>2</sub> | air      | [2]       | 298 | 760 | 61±1  | 58    | -2                  |

Barr and Watts <sup>[1]</sup> measured the diffusivities of CH<sub>2</sub>=CHCl and CHCl=CHCl in air at 298 K, and Lugg <sup>[2]</sup> measured the diffusivities of CHCl=CCl<sub>2</sub> and CCl<sub>2</sub>=CCl<sub>2</sub> in air at 298 K. The measured diffusivities are all 2% smaller than the estimated values.

### References:

- [1] Barr, R. F., and Watts, H.: Diffusion of some organic and inorganic compounds in air, *J. Chem. Eng. Data*, 17, 45-46, 1972.
- [2] Lugg, G. A.: Diffusion coefficients of some organic and other vapors in air, *Analytical Chemistry*, 40, 1072-1077, 1968.

### 3 Compounds with three or more carbon atoms

#### 3.1 CH<sub>3</sub>CH<sub>2</sub>CH<sub>2</sub>Cl, CH<sub>3</sub>CH<sub>2</sub>CH<sub>2</sub>Br, and CH<sub>3</sub>CHBrCH<sub>3</sub>

| species                                            | bath gas | reference | $T$ | $P$ | $D_m$ | $D_e$ | $(D_m - D_e)/D_e$ (%) |
|----------------------------------------------------|----------|-----------|-----|-----|-------|-------|-----------------------|
| CH <sub>3</sub> CH <sub>2</sub> CH <sub>2</sub> Cl | He       | [1]       | 428 | 760 | 480±7 | 474   | 1                     |
| CH <sub>3</sub> CH <sub>2</sub> CH <sub>2</sub> Br | He       | [1]       | 428 | 760 | 450±7 | 475   | -5                    |
|                                                    | air      | [2]       | 298 | 760 | 67±1  | 73    | -8                    |
| CH <sub>3</sub> CHBrCH <sub>3</sub>                | He       | [1]       | 428 | 760 | 461±9 | 474   | -3                    |
|                                                    | air      | [2]       | 298 | 760 | 69±1  | 73    | -4                    |

The measured diffusivity of CH<sub>3</sub>CH<sub>2</sub>CH<sub>2</sub>Cl in He at 428 K <sup>[1]</sup> is only 1% larger than the estimated value.

The measured diffusivities of CH<sub>3</sub>CH<sub>2</sub>CH<sub>2</sub>Br in He at 428 K <sup>[1]</sup> and in air at 298 K <sup>[2]</sup> are 5% and 8% smaller than the estimated values, respectively.

The measured diffusivities of CH<sub>3</sub>CHBrCH<sub>3</sub> in He at 428 K <sup>[1]</sup> and in air at 298 K <sup>[2]</sup> are 3% and 4% smaller than the estimated values, respectively.

#### References:

- [1] Fuller, E. N., Ensley, K., and Giddings, J. C.: Diffusion of halogenated hydrocarbons in helium. Effect of structure on collision cross sections, *J. Phys. Chem.*, 73, 3679-3685, 1969.
- [2] Lugg, G. A.: Diffusion coefficients of some organic and other vapors in air, *Analytical Chemistry*, 40, 1072-1077, 1968.



### 3.2 CH<sub>3</sub>CH<sub>2</sub>CH<sub>2</sub>I and CH<sub>3</sub>CHICH<sub>3</sub>

| species                                           | bath gas       | reference | $T$ | $P$ | $D_m$ | $D_e$ | $(D_m - D_e)/D_e$ (%) |
|---------------------------------------------------|----------------|-----------|-----|-----|-------|-------|-----------------------|
| CH <sub>3</sub> CH <sub>2</sub> CH <sub>2</sub> I | He             | [1]       | 430 | 760 | 440±5 | 449   | -2                    |
|                                                   | H <sub>2</sub> | [2]       | 303 | 760 | 258   | 297   | -13                   |
|                                                   | N <sub>2</sub> | [2]       | 303 | 760 | 60    | 67    | -11                   |
|                                                   | air            | [3]       | 298 | 760 | 66±1  | 63    | 5                     |
| CH <sub>3</sub> CHICH <sub>3</sub>                | He             | [1]       | 430 | 760 | 440±9 | 449   | -2                    |
|                                                   | air            | [3]       | 298 | 760 | 67±1  | 63    | 6                     |

The measured diffusivities of CH<sub>3</sub>CH<sub>2</sub>CH<sub>2</sub>I in He at 430 K,<sup>[1]</sup> in H<sub>2</sub> at 303 K,<sup>[2]</sup> in N<sub>2</sub> at 303 K,<sup>[2]</sup> and in air at 298 K<sup>[3]</sup> are 2% smaller, 13% smaller, 11% smaller, and 5% larger than the estimated values.

The measured diffusivities of CH<sub>3</sub>CHICH<sub>3</sub> in He at 430 K<sup>[1]</sup> and in air at 298 K<sup>[3]</sup> are 2% smaller and 6% larger than the estimated values.

#### References:

- [1] Fuller, E. N., Ensley, K., and Giddings, J. C.: Diffusion of halogenated hydrocarbons in helium. Effect of structure on collision cross sections, *J. Phys. Chem.*, 73, 3679-3685, 1969.
- [2] Byrne, J. J., Maguire, D., and Clarke, J. K. A.: Gas-phase interdiffusion coefficients for some polar organic compounds, *J. Phys. Chem.*, 71, 3051-3052, 1967.
- [3] Lugg, G. A.: Diffusion coefficients of some organic and other vapors in air, *Analytical Chemistry*, 40, 1072-1077, 1968.

### 3.3 CH<sub>3</sub>CHClCH<sub>2</sub>Cl, CH<sub>3</sub>CHBrCH<sub>2</sub>Cl, CH<sub>3</sub>BrCHBrCH<sub>2</sub>Cl, and CH<sub>2</sub>=CHCH<sub>2</sub>Cl

| species                                  | bath gas | reference | $T$ | $P$ | $D_m$  | $D_e$ | $(D_m - D_e)/D_e$ (%) |
|------------------------------------------|----------|-----------|-----|-----|--------|-------|-----------------------|
| CH <sub>3</sub> CHClCH <sub>2</sub> Cl   | air      | [1]       | 298 | 760 | 60±1   | 63    | -3                    |
| CH <sub>3</sub> CHBrCH <sub>2</sub> Cl   | He       | [2]       | 427 | 760 | 433±12 | 423   | 2                     |
| CH <sub>2</sub> BrCHBrCH <sub>2</sub> Cl | air      | [1]       | 298 | 760 | 52±1   | 58    | -9                    |
| CH <sub>2</sub> =CHCH <sub>2</sub> Cl    | air      | [1]       | 298 | 760 | 74±1   | 73    | 2                     |

The measured diffusivities in air at 298 K <sup>[1]</sup> are 3% smaller than the estimated value for CH<sub>3</sub>CHCH<sub>2</sub>Cl, 9% smaller for CH<sub>3</sub>CHBrCH<sub>2</sub>Cl, and 2% larger for CH<sub>2</sub>=CHCH<sub>2</sub>Cl, respectively.

The measured diffusivity of CH<sub>3</sub>CHBrCH<sub>2</sub>Cl in He at 427 K <sup>[2]</sup> is 2% larger than the estimated value.

#### References:

- [1] Lugg, G. A.: Diffusion coefficients of some organic and other vapors in air, *Analytical Chemistry*, 40, 1072-1077, 1968.
- [2] Fuller, E. N., Ensley, K., and Giddings, J. C.: Diffusion of halogenated hydrocarbons in helium. Effect of structure on collision cross sections, *J. Phys. Chem.*, 73, 3679-3685, 1969.

### 3.4 1-chlorobutane and 2-chlorobutane

| species        | bath gas | reference | $T$ | $P$ | $D_m$ | $D_e$ | $(D_m - D_e)/D_e$ (%) |
|----------------|----------|-----------|-----|-----|-------|-------|-----------------------|
| 1-chlorobutane | He       | [1]       | 429 | 760 | 422±8 | 425   | -1                    |
|                | air      | [2]       | 296 | 744 | 67±1  | 63    | 8                     |
|                |          |           | 296 | 743 | 68    | 63    | 8                     |
|                |          |           | 295 | 748 | 67    | 62    | 7                     |
| 2-chlorobutane | He       | [1]       | 429 | 760 | 426±6 | 425   | 0                     |

The differences between the measured and estimated diffusivities in He at 429 K are around 1% for both 1-chlorobutane and 2-chlorobutane.<sup>[1]</sup>

The average measured diffusivity of 1-chlorobutane in air at 296 K<sup>[2]</sup> is 8% larger than the estimated value.

#### References:

- [1] Fuller, E. N., Ensley, K., and Giddings, J. C.: Diffusion of halogenated hydrocarbons in helium. Effect of structure on collision cross sections, J. Phys. Chem., 73, 3679-3685, 1969.
- [2] Grob, A. K., and Elwakil, M. M.: An interferometric technique for measuring binary diffusion coefficients, Journal of Heat Transfer, 91, 259-265, 1969.

### 3.5 1-bromobutane and 2-bromobutane

| species       | bath gas       | reference | $T$ | $P$ | $D_m$  | $D_e$ | $(D_m - D_e)/D_e$ (%) |
|---------------|----------------|-----------|-----|-----|--------|-------|-----------------------|
| 1-bromobutane | He             | [1]       | 427 | 760 | 414±5  | 421   | -2                    |
|               | H <sub>2</sub> | [2]       | 303 | 760 | 253    | 281   | -10                   |
|               | N <sub>2</sub> | [2]       | 303 | 760 | 61     | 68    | -10                   |
| 2-bromobutane | He             | [1]       | 427 | 760 | 420±10 | 422   | -1                    |

The measured diffusivities of 1-bromobutane in He at 427 K,<sup>[1]</sup> in H<sub>2</sub> at 303 K,<sup>[2]</sup> and in N<sub>2</sub> at 303 K<sup>[2]</sup> are 2%, 10%, and 10% smaller than the estimated values.

The difference between the measured<sup>[1]</sup> and estimated diffusivities of 2-bromobutane in He at 427 K is less than 1%.

#### References:

- [1] Fuller, E. N., Ensley, K., and Giddings, J. C.: Diffusion of halogenated hydrocarbons in helium. Effect of structure on collision cross sections, *J. Phys. Chem.*, 73, 3679-3685, 1969.
- [2] Byrne, J. J., Maguire, D., and Clarke, J. K. A.: Gas-phase interdiffusion coefficients for some polar organic compounds, *J. Phys. Chem.*, 71, 3051-3052, 1967.

### 3.6 1-iodobutane, 2-iodobutane, and dichloroethyl ether

| Species             | bath gas | reference | $T$ | $P$ | $D_m$  | $D_e$ | $(D_m - D_e)/D_e$ (%) |
|---------------------|----------|-----------|-----|-----|--------|-------|-----------------------|
| 1-iodobutane        | He       | [1]       | 428 | 760 | 398±5  | 402   | -1                    |
| 2-iodobutane        | He       | [1]       | 427 | 760 | 414±10 | 400   | 3                     |
| dichloroethyl ether | air      | [2]       | 298 | 760 | 53     | 55    | -5                    |

The differences between the measured and estimated diffusivities are 1% for 1-iodobutane in He at 428 K,<sup>[1]</sup> 3% for 2-iodobutane in He at 427 K,<sup>[1]</sup> and 5% for dichloroethyl ether in air at 298 K,<sup>[2]</sup> respectively.

#### References:

- [1] Fuller, E. N., Ensley, K., and Giddings, J. C.: Diffusion of halogenated hydrocarbons in helium. Effect of structure on collision cross sections, *J. Phys. Chem.*, 73, 3679-3685, 1969.
- [2] Lugg, G. A.: Diffusion coefficients of some organic and other vapors in air, *Analytical Chemistry*, 40, 1072-1077, 1968.

### 3.7 1-chloropentane and 1-bromo-3-methyl-butane

| species                 | bath gas       | reference | T   | P   | $D_m$ | $D_e$ | $(D_m - D_e)/D_e$ (%) |
|-------------------------|----------------|-----------|-----|-----|-------|-------|-----------------------|
| 1-chloropentane         | He             | [1]       | 428 | 760 | 394±3 | 385   | 2                     |
| 1-bromo-3-methyl-butane | H <sub>2</sub> | [2]       | 303 | 760 | 235   | 258   | -9                    |
|                         | N <sub>2</sub> | [2]       | 303 | 760 | 61    | 62    | -2                    |
|                         | Ar             | [2]       | 303 | 760 | 50    | 56    | -11                   |

The measured diffusivity of 1-chloropentane in He at 428 K <sup>[1]</sup> is 2% larger than the estimated value.

Byrne et al.<sup>[2]</sup> measured the diffusivities of 1-bromo-3-methyl-butane at 303 K. The differences between measurements and estimations are 9%, 2%, and 11% for diffusivities in H<sub>2</sub>, N<sub>2</sub>, and Ar, respectively.

#### References:

- [1] Fuller, E. N., Ensley, K., and Giddings, J. C.: Diffusion of halogenated hydrocarbons in helium. Effect of structure on collision cross sections, *J. Phys. Chem.*, 73, 3679-3685, 1969.
- [2] Byrne, J. J., Maguire, D., and Clarke, J. K. A.: Gas-phase interdiffusion coefficients for some polar organic compounds, *J. Phys. Chem.*, 71, 3051-3052, 1967.

### 3.8 1-fluorohexane, 1-bromohexane, 2-bromohexane, and 3-bromohexane

| species        | bath gas | reference | $T$ | $P$ | $D_m$  | $D_e$ | $(D_m - D_e)/D_e$ (%) |
|----------------|----------|-----------|-----|-----|--------|-------|-----------------------|
| 1-fluorohexane | He       | [1]       | 432 | 760 | 374±5  | 369   | 1                     |
| 1-bromohexane  | He       | [1]       | 428 | 760 | 350±6  | 354   | -1                    |
| 2-bromohexane  | He       | [1]       | 428 | 760 | 357±9  | 354   | 1                     |
| 3-bromohexane  | He       | [1]       | 429 | 760 | 356±33 | 355   | 1                     |

Fuller et al.<sup>[1]</sup> measured the diffusivities of 1-fluorohexane, 1-bromohexane, 2-bromohexane, and 3-bromohexane in He at ~430 K. The differences between the measured and estimated diffusivities are around 1% for all the four compounds.

#### References:

- [1] Fuller, E. N., Ensley, K., and Giddings, J. C.: Diffusion of halogenated hydrocarbons in helium. Effect of structure on collision cross sections, *J. Phys. Chem.*, 73, 3679-3685, 1969.

### 3.9 C<sub>7</sub>F<sub>18</sub>

| bath gas                       | reference | $T$ | $P$ | $D_m$    | $D_e$ | $(D_m - D_e)/D_e$ (%) |
|--------------------------------|-----------|-----|-----|----------|-------|-----------------------|
| C <sub>8</sub> H <sub>18</sub> | [1]       | 303 | 760 | 9.0±0.2  | 11.0  | -18                   |
|                                |           | 323 | 760 | 10.2±0.5 | 12.3  | -17                   |

The measured diffusivities of C<sub>7</sub>F<sub>18</sub> in C<sub>8</sub>H<sub>18</sub> <sup>[1]</sup> are 18% smaller than the estimated value at 303 K and 17% smaller at 323 K.

#### References:

- [1] Weissman, S.: Estimation of diffusion coefficients from viscosity measurements-polar + polyatomic gases, *J. Chem. Phys.*, 40, 3397-3406, 1964.



## 4 Aromatic compounds

### 4.1 fluorobenzene, chlorobenzene, and bromobenzene

| species       | bath gas       | reference | $T$ | $P$ | $D_m$ | $D_e$ | $(D_m - D_e)/D_e$ (%) |
|---------------|----------------|-----------|-----|-----|-------|-------|-----------------------|
| fluorobenzene | He             | [1]       | 430 | 760 | 430±6 | 395   | 9                     |
|               | H <sub>2</sub> | [2]       | 303 | 760 | 287   | 263   | 9                     |
|               | N <sub>2</sub> | [2]       | 303 | 760 | 70    | 63    | 11                    |
|               | air            | [3]       | 295 | 734 | 61    | 58    | 4                     |
|               |                | [3]       | 295 | 729 | 61    | 58    | 5                     |
|               |                | [3]       | 295 | 735 | 61    | 58    | 4                     |
|               | Ar             | [2]       | 303 | 760 | 63    | 57    | 10                    |
| chlorobenzene | He             | [1]       | 431 | 760 | 412±5 | 386   | 7                     |
|               | air            | [4]       | 299 | 760 | 56    | 57    | -2                    |
|               |                | [4]       | 313 | 760 | 60    | 62    | -3                    |
|               |                | [4]       | 332 | 760 | 68    | 69    | -1                    |
|               |                | [5]       | 298 | 760 | 57    | 57    | -1                    |
| bromobenzene  | He             | [1]       | 427 | 760 | 413±8 | 379   | 9                     |

The diffusivity of fluorobenzene in He at 430 K was measured by Fuller et al.,<sup>[1]</sup> and the measured diffusivity is 9% larger than the estimated value.

The diffusivity of fluorobenzene in H<sub>2</sub> at 303 K was measured by Byrne et al.,<sup>[2]</sup> and the measured diffusivity is 9% larger than the estimated value.

The diffusivity of fluorobenzene in Ar at 303 K was measured by Byrne et al.,<sup>[2]</sup> and the measured diffusivity is 10% larger than the estimated value.

The diffusivity of fluorobenzene in N<sub>2</sub> at 303 K, measured by Byrne et al.,<sup>[2]</sup> is 11% larger than the estimated value.

The average diffusivity of fluorobenzene in N<sub>2</sub> at 295 K, measured by Grob and Elwakil,<sup>[3]</sup> is ~5% larger than the estimated value.

Fuller et al.<sup>[1]</sup> measured the diffusivity of chlorobenzene in He, and the measured diffusivity is 7% larger than the estimated value.

The diffusivities of chlorobenzene in air were measured by two studies.<sup>[4, 5]</sup> The diffusivities from 299 to 332 K, measured by Gilliland,<sup>[4]</sup> are around 3% (or less) smaller than the estimated values, and the diffusivity at 298 K, measured by Lugg,<sup>[5]</sup> is only 1% smaller than the estimated value.

The diffusivity of bromobenzene in He, measured by Fuller et al.,<sup>[1]</sup> is 9% larger than the estimated value.

### References:

- [1] Fuller, E. N., Ensley, K., and Giddings, J. C.: Diffusion of halogenated hydrocarbons in helium. Effect of structure on collision cross sections, *J. Phys. Chem.*, 73, 3679-3685, 1969.
- [2] Byrne, J. J., Maguire, D., and Clarke, J. K. A.: Gas-phase interdiffusion coefficients for some polar organic compounds, *J. Phys. Chem.*, 71, 3051-3052, 1967.
- [3] Grob, A. K., and Elwakil, M. M.: An interferometric technique for measuring binary diffusion coefficients, *Journal of Heat Transfer*, 91, 259-265, 1969.
- [4] Gilliland, E. R.: Diffusion coefficients in gaseous systems, *Industrial and Engineering Chemistry*, 26, 681-685, 1934.
- [5] Lugg, G. A.: Diffusion coefficients of some organic and other vapors in air, *Analytical Chemistry*, 40, 1072-1077, 1968.

## 4.2 hexafluorobenzene

| bath gas | reference | $T$ | $P$ | $D_m$       | $D_e$ | $(D_m - D_e)/D_e$ (%) |
|----------|-----------|-----|-----|-------------|-------|-----------------------|
| He       | [1]       | 429 | 760 | $344 \pm 6$ | 314   | 10                    |

The diffusivity of hexafluorobenzene in He at 429 K, measured by Fuller et al.,<sup>[1]</sup> is 10% larger than the estimated value.

### References:

- [1] Fuller, E. N., Ensley, K., and Giddings, J. C.: Diffusion of halogenated hydrocarbons in helium. Effect of structure on collision cross sections, *J. Phys. Chem.*, 73, 3679-3685, 1969.

### 4.3 4-fluorotoluene, 2-chlorotoluene, 3-chlorotoluene, 4-chlorotoluene, and benzyl chloride

| species         | bath gas | reference | $T$ | $P$ | $D_m$ | $D_e$ | $(D_m - D_e)/D_e$ (%) |
|-----------------|----------|-----------|-----|-----|-------|-------|-----------------------|
| 4-fluorotoluene | He       | [1]       | 432 | 760 | 386±5 | 366   | 5                     |
| 2-chlorotoluene | air      | [2]       | 298 | 760 | 52    | 53    | -1                    |
| 3-chlorotoluene | air      | [2]       | 298 | 760 | 49    | 53    | -7                    |
| 4-chlorotoluene | air      | [2]       | 298 | 760 | 47    | 53    | -11                   |
| benzyl chloride | air      | [2]       | 298 | 760 | 54    | 53    | 2                     |

The diffusivity of 4-fluorotoluene in He at 432 K, measured by Fuller et al.,<sup>[1]</sup> is 5% larger than the estimated value.

Lugg<sup>[2]</sup> measured the diffusivities of 2-chlorotoluene, 3-chlorotoluene, 4-chlorotoluene, and benzyl chloride in air at 298 K. The differences between the measured and estimated diffusivities are 1%, 7%, 11%, and 2% for 2-chlorotoluene, 3-chlorotoluene, 4-chlorotoluene, and benzyl chloride, respectively.

#### References:

- [1] Fuller, E. N., Ensley, K., and Giddings, J. C.: Diffusion of halogenated hydrocarbons in helium. Effect of structure on collision cross sections, *J. Phys. Chem.*, 73, 3679-3685, 1969.
- [2] Lugg, G. A.: Diffusion coefficients of some organic and other vapors in air, *Analytical Chemistry*, 40, 1072-1077, 1968.
